# Supplementary material for: JSBML 1.0: providing a smorgasbord of options to encode systems biology models
Source: PubMed Central journal article supplement (PMC4595895; doi:10.1093/bioinformatics/btv341), 2015-06-16

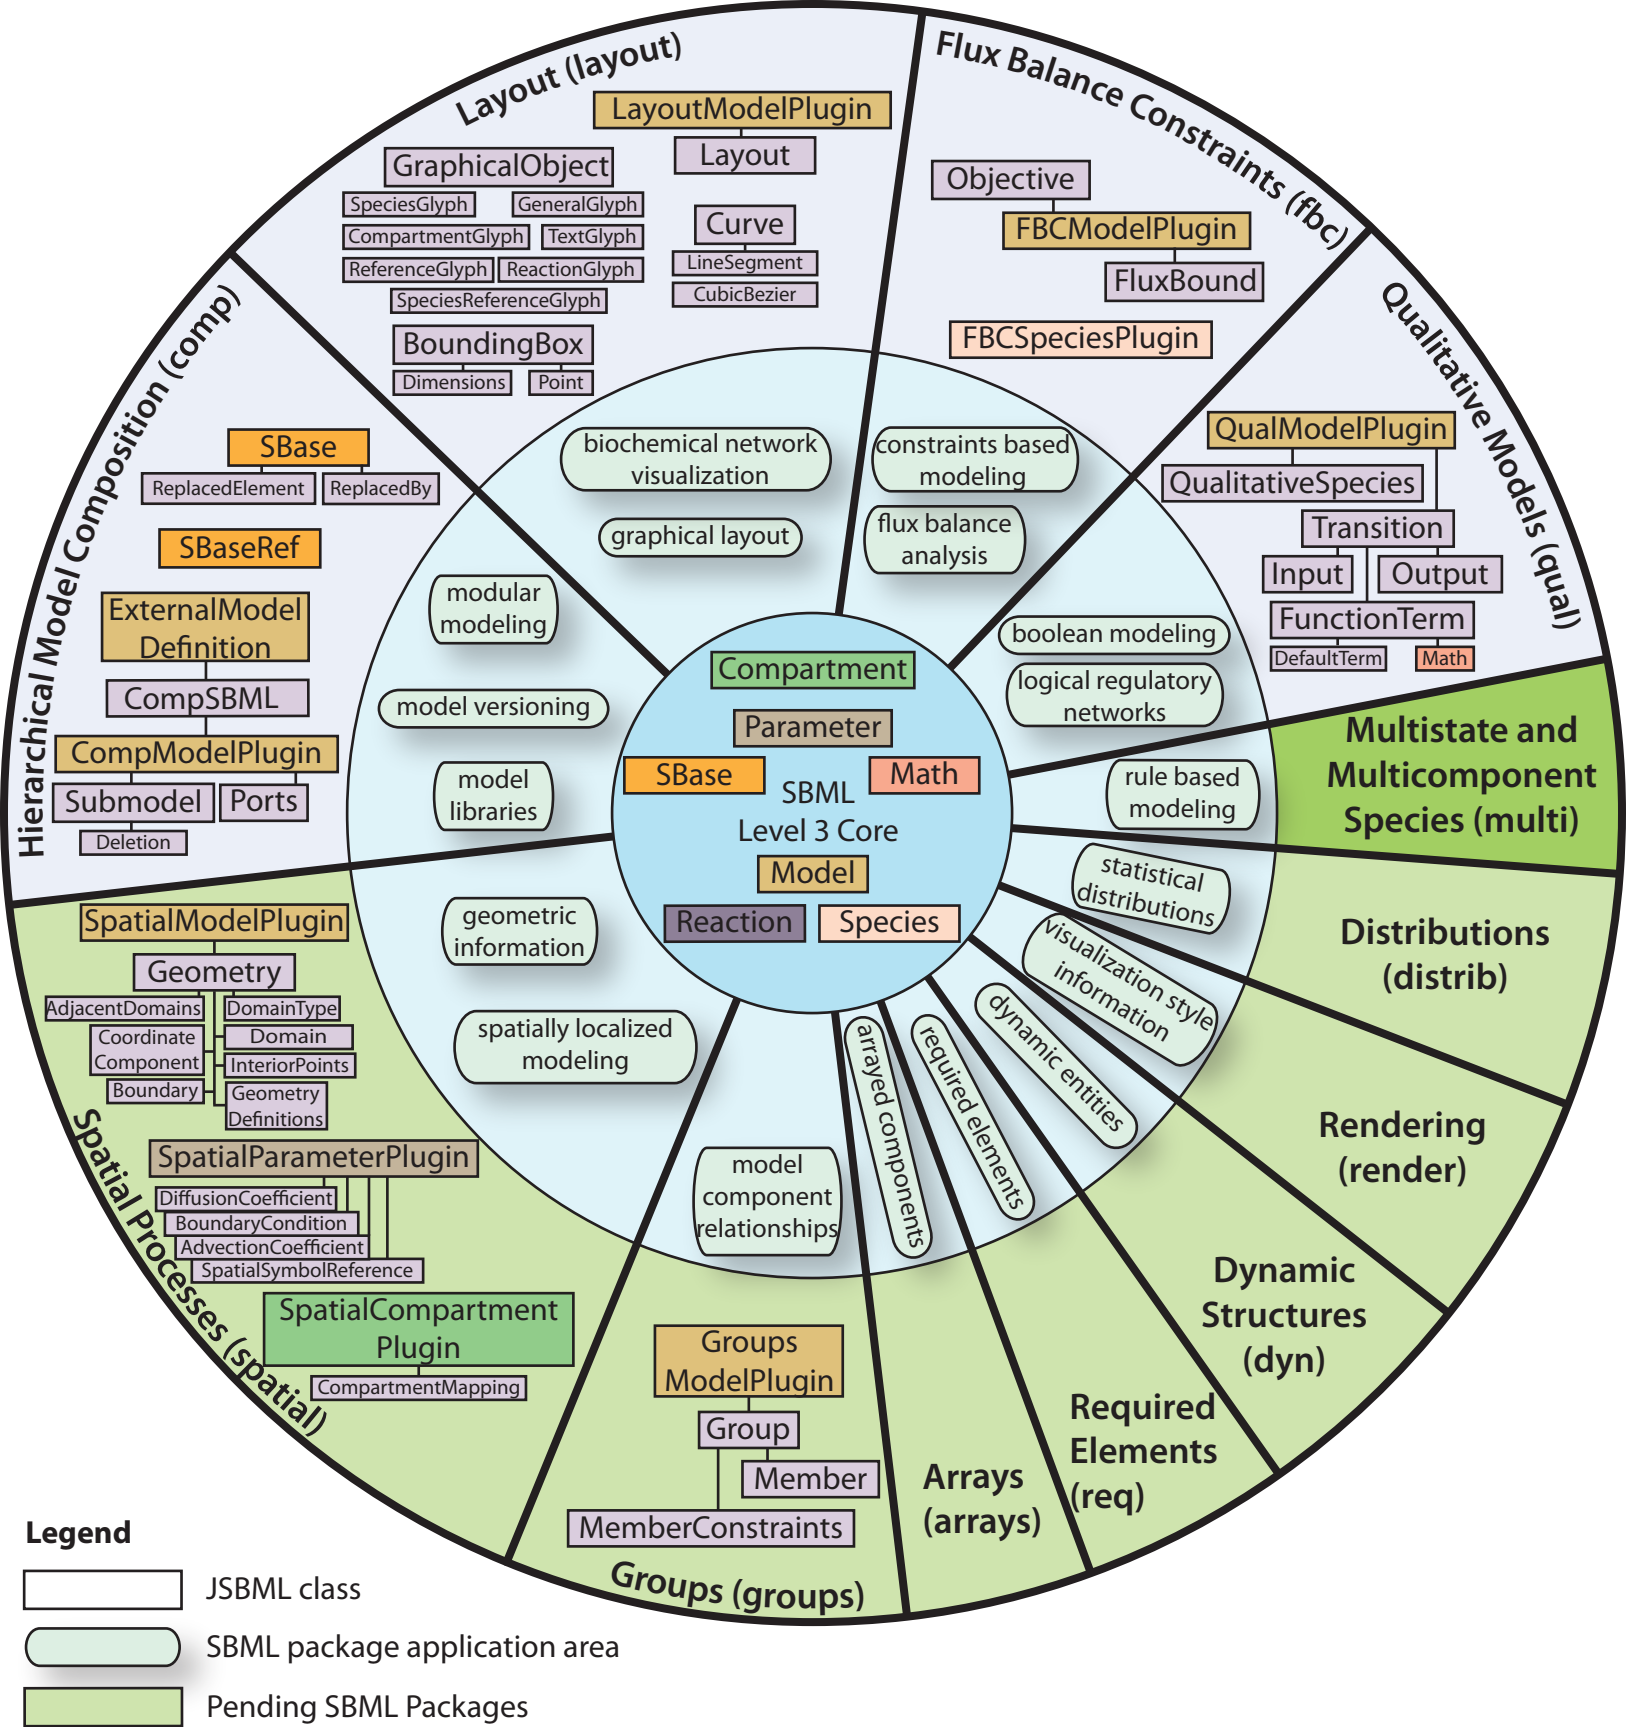

Supplement: supp_btv341_sbml_lvl3_extensions.pdf [file supp_btv341_sbml_lvl3_extensions.pdf]
